# Supplementary material for: Transcriptional reprogramming of skeletal muscle stem cells by the niche environment
Source: PubMed Central journal article supplement (PMC9892560; doi:10.1038/s41467-023-36265-x), 2023-02-01
Supplement: 41467_2023_36265_MOESM3_ESM.pdf [file 41467_2023_36265_MOESM3_ESM.pdf]

## **Description of Additional Supplementary Files:**

**Supplementary Data 1:** List of the top differentially expressed genes between young and aged MuSCs, FAPs and macrophages ( $s\text{-value} < 0.05$ ,  $\text{LFC} > 1$ ).

**Supplementary Data 2:** List of reversible and irreversible genes that are affected by aging (moderated  $\text{LFC} > 1$ ,  $s\text{-value} < 0.05$ ).

**Supplementary Data 3:** List of reversible and irreversible genes that are affected by aging ( $\text{LFC} > 1$ ,  $s\text{-value} < 0.15$ ,  $\text{LFC batch} < 0.5$ ).

**Supplementary Data 4:** List of differentially methylated regions (DMRs) in young compared to aged MuSCs.

**Supplementary Data 5:** Differentially accessible ATAC-seq peaks between young and aged MuSCs ( $\text{LFC} > 1$ , adjusted  $p < 0.05$ ).
